# Supplementary material
Source: PubMed Central journal article supplement (PMC3645294)
Supplement: NIHMS273042-supplement-Supp1.pdf [file NIHMS273042-supplement-Supp1.pdf]

**SUPPLEMENTAL MATERIAL**

**Supplemental Table. Dietary Components (adjusted to 2500 kcal) Used for the Mediterranean Diet Score Calculation or Otherwise Used in the Analysis\*.**

| Dietary Component                                        | Foods Included                                                                                                                                                                                            | Criteria for 1 Point  | Median |        |
|----------------------------------------------------------|-----------------------------------------------------------------------------------------------------------------------------------------------------------------------------------------------------------|-----------------------|--------|--------|
|                                                          |                                                                                                                                                                                                           |                       | MZ     | DZ     |
| <b>Dietary components for the score calculation</b>      |                                                                                                                                                                                                           |                       |        |        |
| <i>Desirable components</i>                              |                                                                                                                                                                                                           |                       |        |        |
| <b>Vegetables (g/day)</b>                                | All vegetables except potatoes                                                                                                                                                                            | ≥ median intake (g/d) | 135.1  | 129.8  |
| <b>Legumes (g/day)</b>                                   | Peas and beans                                                                                                                                                                                            | ≥ median intake (g/d) | 34.6   | 32.5   |
| <b>Fruits and nuts (g/day)</b>                           | All fruits and juices, all nuts and peanut butter                                                                                                                                                         | ≥ median intake (g/d) | 298.3  | 247.8  |
| <b>Cereals (g/day)</b>                                   | All cereal foods included as follows:<br><br>Cold cereals, white bread, dark bread, rice, pasta, as well as cereals in hotdog, pie, cake, cookie, and hamburger.<br><br>Sugar and potatoes were excluded. | ≥ median intake (g/d) | 134.6  | 121.5  |
| <b>Fish (g/day)</b>                                      | Fish                                                                                                                                                                                                      | ≥ median intake       | 18.6   | 20.2   |
| <b>Ratio of monounsaturated to saturated fatty acids</b> | The whole diet                                                                                                                                                                                            | ≥ median intake       | 1.098  | 1.102  |
| <b>Ethanol (g/day)</b>                                   | Wine, beer and liquor                                                                                                                                                                                     | median~33 g/d         | 1.91   | 1.91   |
| <i>Undesirable components</i>                            |                                                                                                                                                                                                           |                       |        |        |
| <b>Dairy products (g/day)</b>                            | All dairy products                                                                                                                                                                                        | < median intake (g/d) | 318.4  | 281.5  |
| <b>Meats (g/day)</b>                                     | All meats excluding eggs and fish                                                                                                                                                                         | < median intake (g/d) | 229.1  | 230.6  |
| <b>Food groups forced into models</b>                    |                                                                                                                                                                                                           |                       |        |        |
| <b>Eggs (g/day)</b>                                      | eggs                                                                                                                                                                                                      | N/A                   | 20.4   | 28.8   |
| <b>Potatoes (g/day)</b>                                  | potatoes                                                                                                                                                                                                  | N/A                   | 147.2  | 153.5  |
| <b>Total energy intake (kcal/day) †</b>                  | N/A                                                                                                                                                                                                       | N/A                   | 1442.0 | 1393.6 |

Abbreviation: MZ, monozygotic twins; DZ, dizygotic twins.

\* Medians for dietary components were calculated by zygosity in order to conduct analyses stratified by zygosity in our all-male sample, as MZ twins share 100% genes while DZ twins share on average 50% genes.

† Unadjusted total energy intake, to convert values for total energy intake to kJ, multiplied by 4.184.
